# Supplementary material for: Synthesis of controlled-size silver nanoparticles for the administration of methotrexate drug and its activity in colon and lung cancer cells
Source: Royal Society of Chemistry journal article supplement (doi:10.1039/c9ra08657a), 2020-01-01

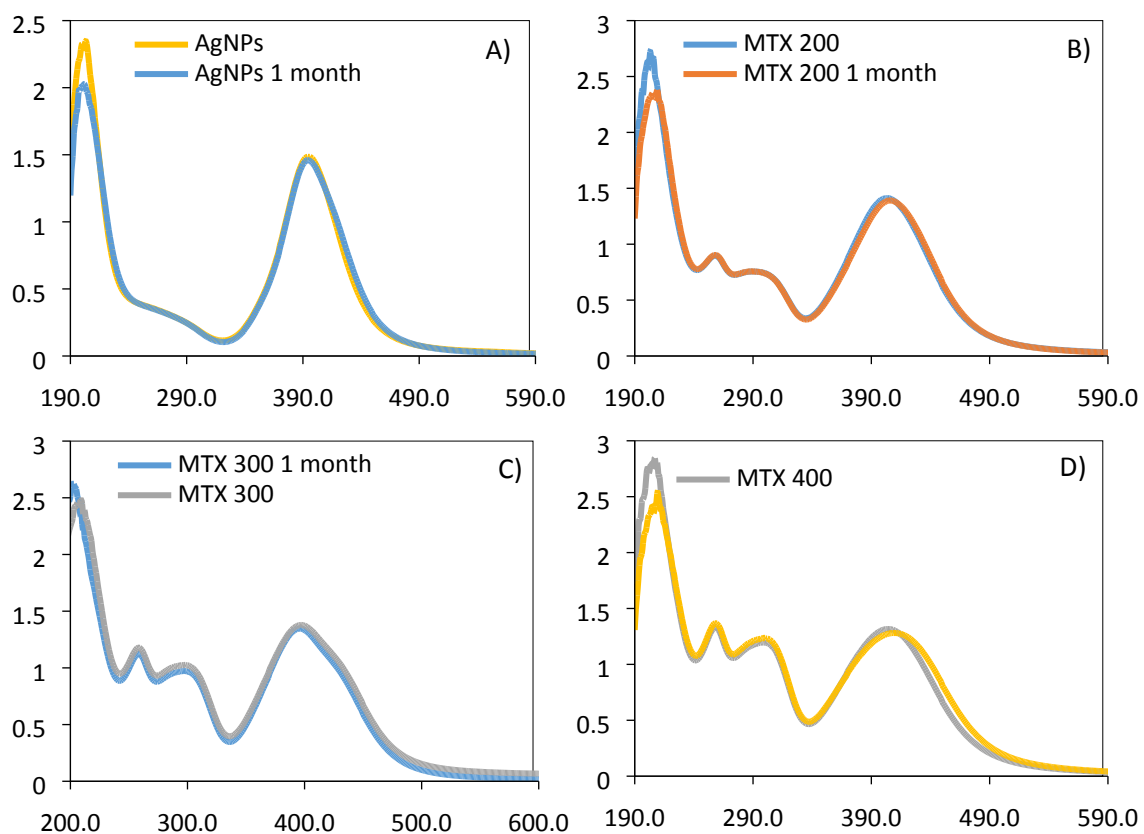

Figure S1. Long term nanoparticles stability test (1month): A) AgNPs; B) AgNPs MTX 200; C) AgNPs MTX 300; D) AgNPs MTX 400.

Figure S2. Short term stability (24 hours) of AgNPs, AgNPs MTX200, AgNPs MTX300 and AgNPs MTX400 in a) Milli-Q water b) PBS c) PBS with 10% FBS. In all cases they are not stable when diluted by only phosphate buffered solution (PBS), while in the presence of fetal bovine serum (FBS) the particles are stable at least for 24 hours without the addition of DMEM.

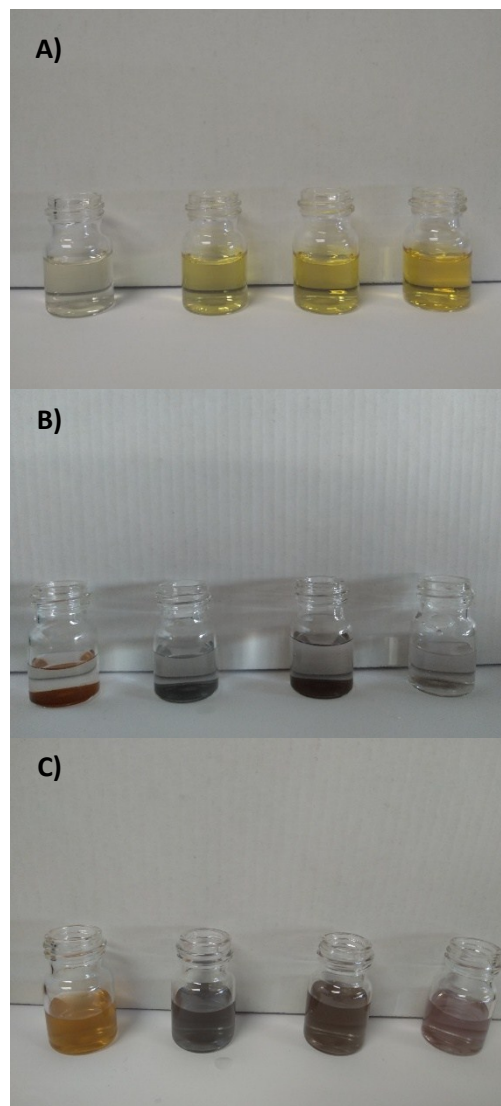

Supplement: c9ra08657a1.pdf [file c9ra08657a1.pdf]
